# Supplementary material for: seRNA PAM controls skeletal muscle satellite cell proliferation and aging through trans regulation of Timp2 expression synergistically with Ddx5
Source: PubMed Central journal article supplement (PMC9381903; doi:10.1111/acel.13673), 2022-07-18

Figure S1. So K.K.H. & Huang Y. et. al.

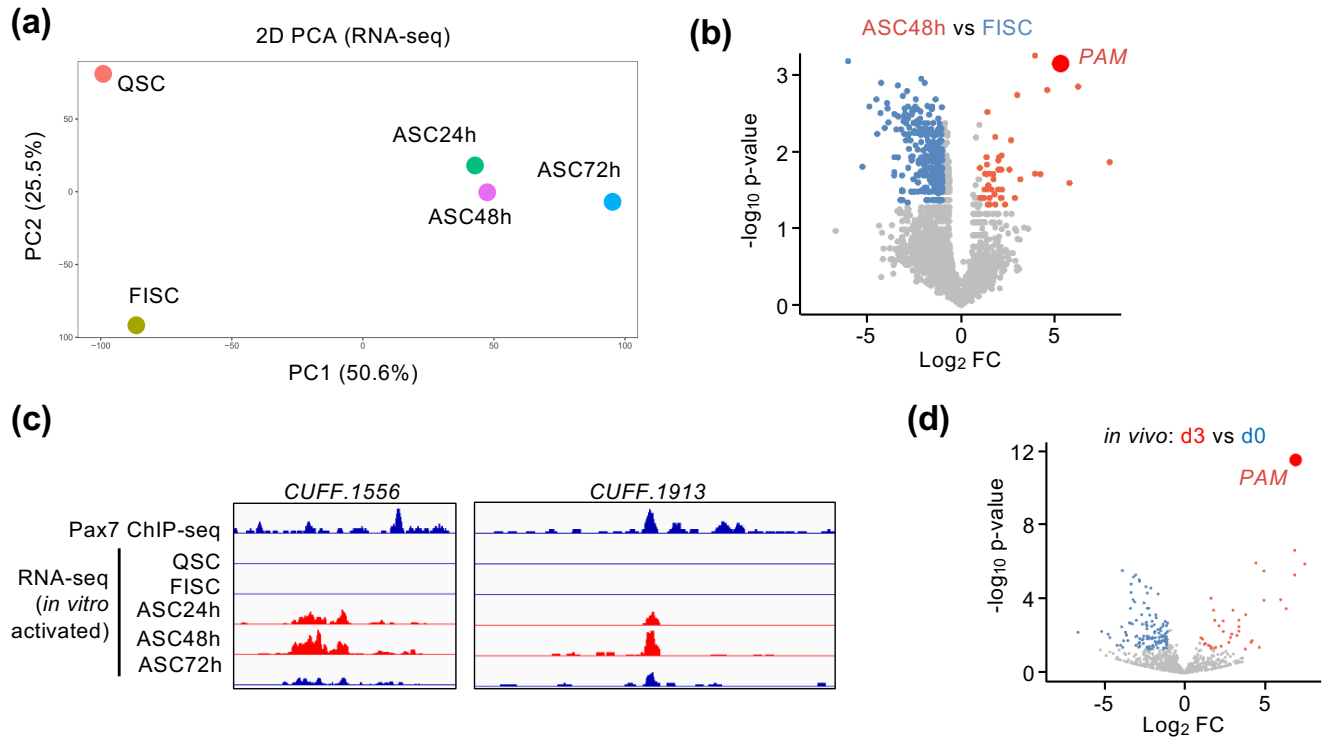

**Figure S2. So K.K.H. & Huang Y. et. al.**

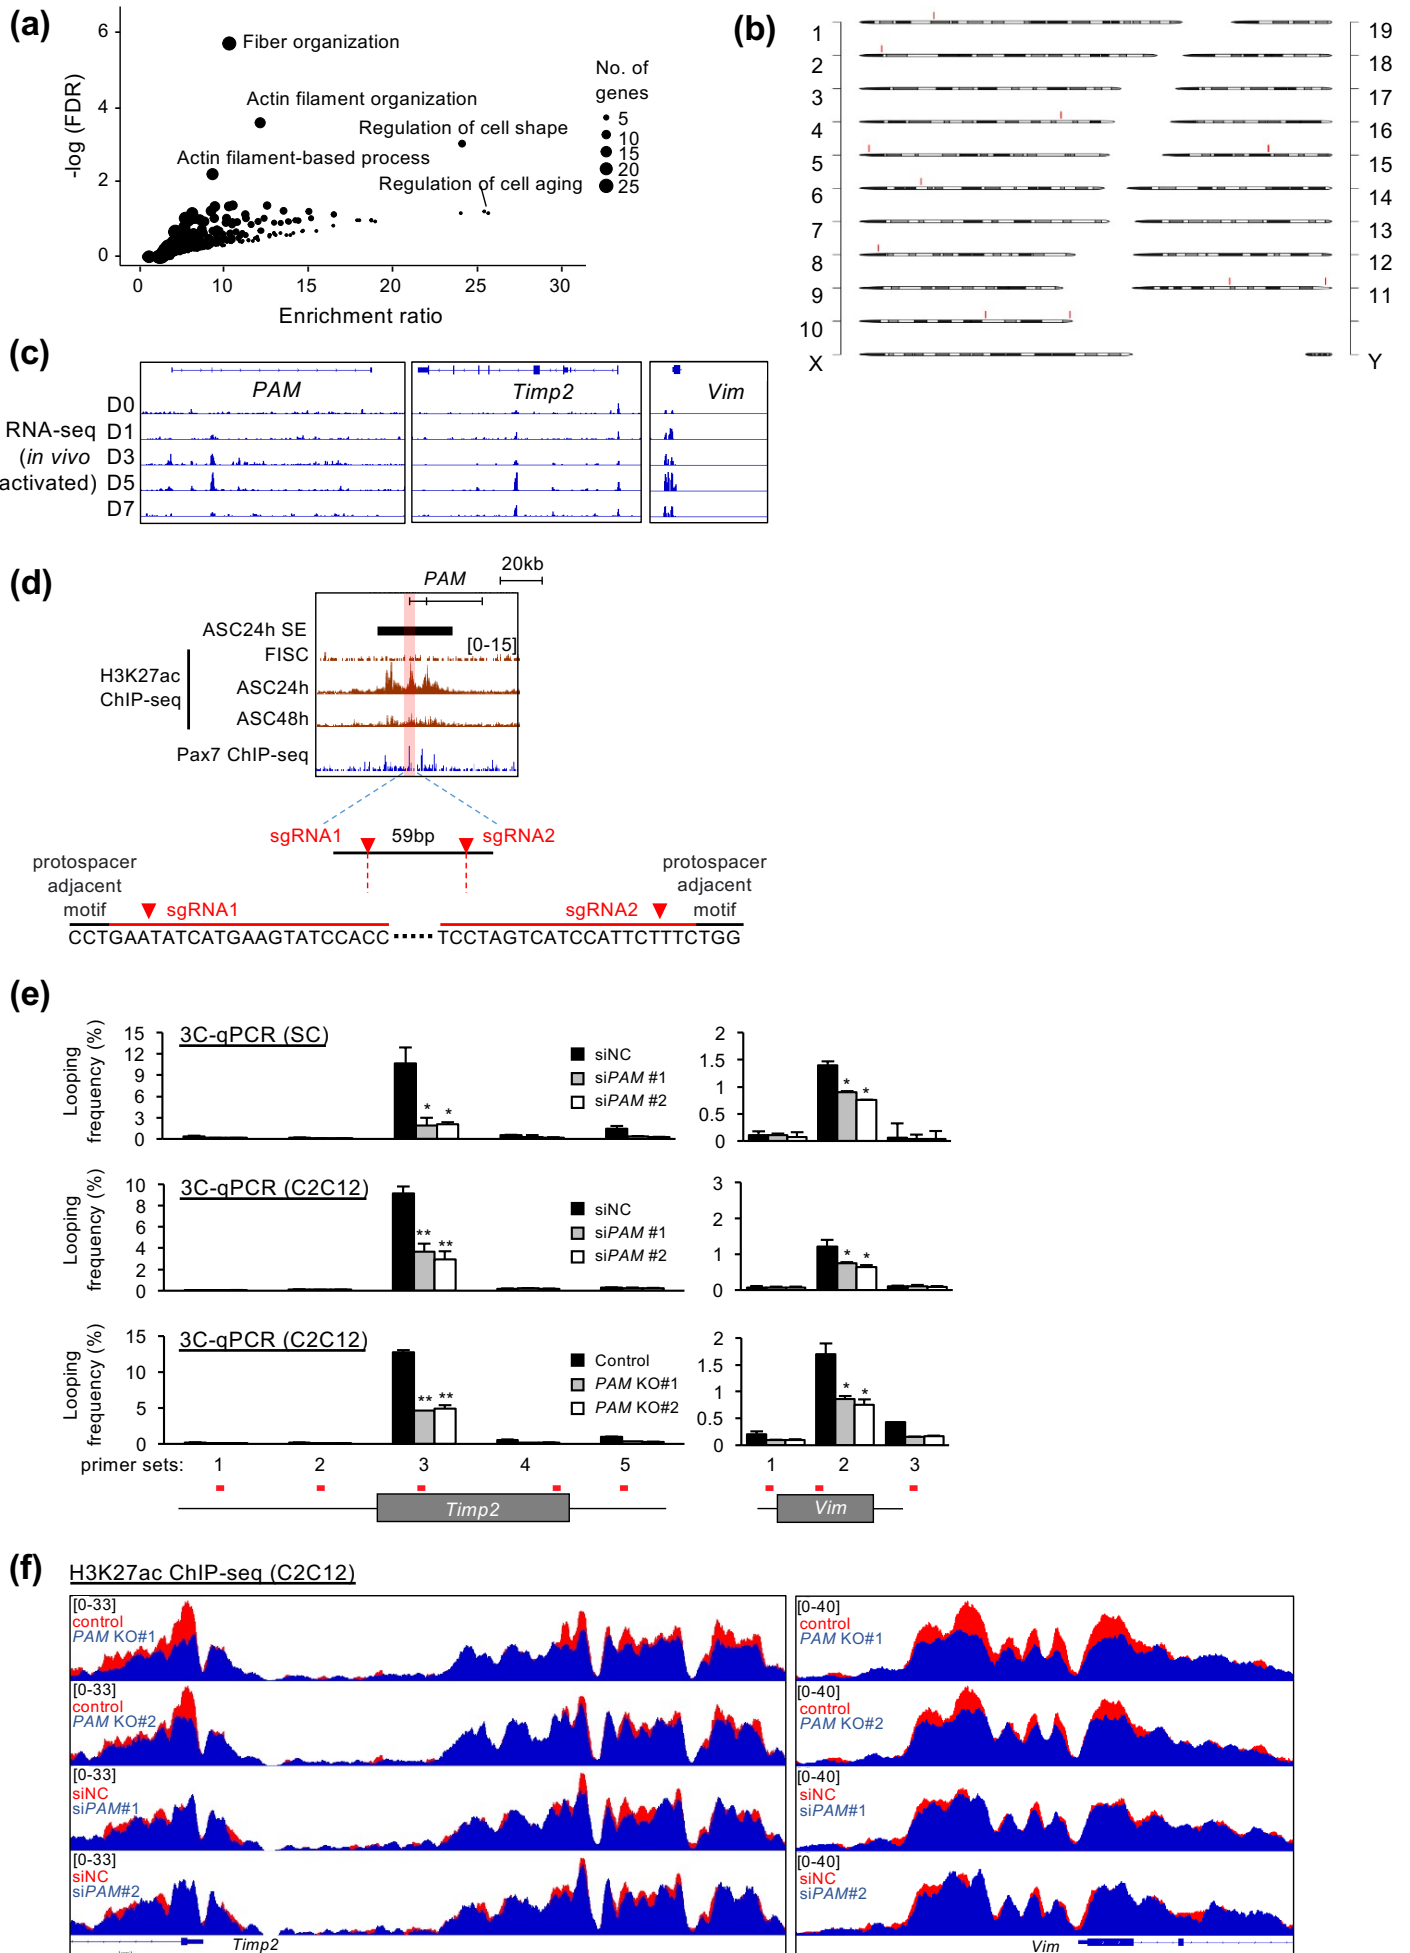

**Figure S3. So K.K.H. & Huang Y. et. al.**

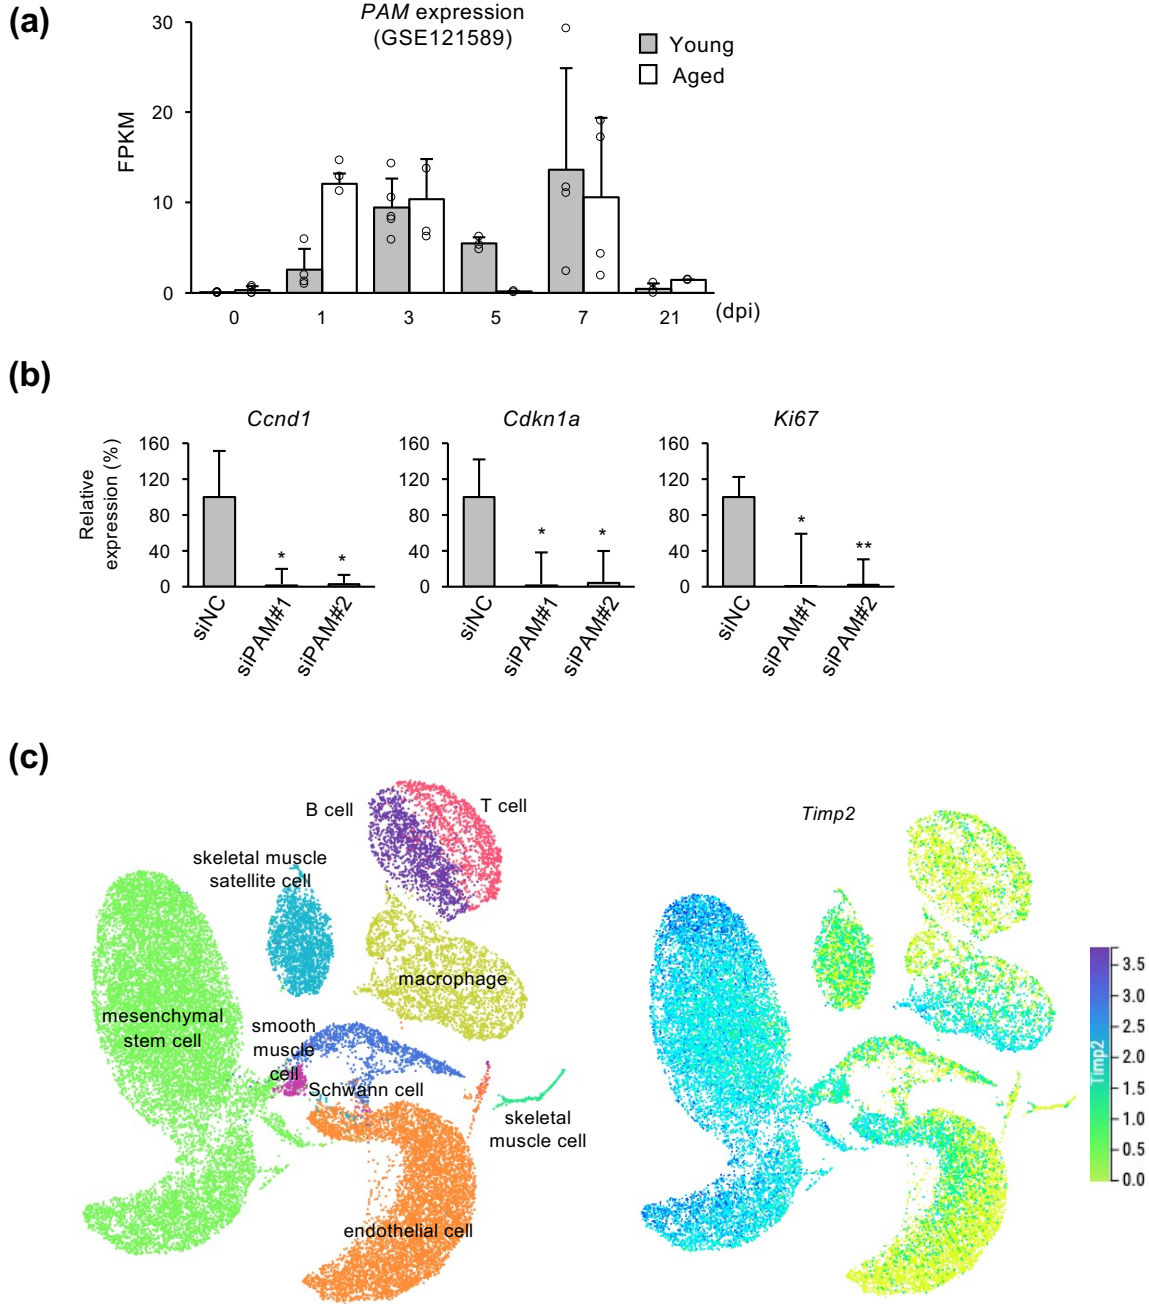

Supplement: ACEL-21-e13673-s004.pdf [file ACEL-21-e13673-s004.pdf]
